# Supplementary material
Source: PubMed Central journal article supplement (PMC2910838)
Supplement: NIHMS220215-supplement-01.pdf [file NIHMS220215-supplement-01.pdf]

## Evolution of the mutation rate

Michael Lynch

Department of Biology, Indiana University, Bloomington, IN 47405

### SUPPLEMENTAL MATERIAL

#### I. General Procedures for Estimating the Base-substitutional Mutation Rate / Nucleotide Site.

The general approach to estimating mutation rates from data on reporter constructs follows the procedures of Drake (1991), with some modifications as applied in Lynch (2010). The mutation rate to single-site base-pair substitutions was computed as

$$u_{BS} = u_L \cdot f_T \cdot f_{BS} / (L \cdot f_L \cdot f_D)$$

where  $u_L$  is the detected per-locus mutation rate;  $f_T$  is the fraction of mutations found after sequencing the candidate locus;  $f_{BS}$  is the fraction of detected mutations due to base substitutions;  $L$  is the length of the coding region (in bases);  $f_L$  is the fraction of the length wherein mutations have detectable phenotypic effects; and  $f_D$  is the fraction of base-substitutional mutations that are detectable.

The detectability factor was calculated as

$$f_D = x(n_m + n_n) / n_n$$

where  $n_m$  and  $n_n$  denote the numbers of observed missense and nonsense mutations, and the factor  $x$  denotes the fraction of base substitutions at sense codons that are expected to lead to nonsense mutations. Generally, as in Drake (1991),  $x$  was assumed to equal  $3/64 = 0.047$ , based on the idea that 3 of 64 codons are chain terminating (which ignores bias in the mutational spectrum) and the fact that only a fraction of mutations at sense codons have functional effects. [For humans, when  $x$  was obtained more directly in a gene-specific manner (Lynch 2010), the resultant values of  $x$  ranged from 0.027 to 0.057, with a mean of 0.040 (0.001), not greatly different from this simpler approximation]. Using this approach,  $f_D$  takes on extreme values of  $x$  and 1.0 when the fractions of observable base-substitution mutations creating nonsense mutations at a locus are 1.0 and  $x$ , respectively. Use of the scaling factor  $f_D$  assumes that all nonsense mutations within the region of the gene susceptible to phenotypic effects are detectable, and to the extent that this is not the case, the mutation rate will be underestimated. In addition,  $f_L$  is often unknown and must then be assumed to equal 1.0, which will cause an underestimate of the mutation rate if the true value of  $f_L$  is  $<1.0$ .

Many studies of mutation in microbes simply report the frequencies of mutations rather than the actual locus-specific rates ( $u_L$ ). Using the approach of Drake (1991), if the frequencies were determined from exponentially growing cultures with a measure of final population size available, the per-locus mutation rates could be estimated from the rate of accumulation of mutations per population doubling. Otherwise, the data were deemed unusable for mutation-rate estimation purposes. Per-locus rates were converted to per-site rates after correcting for the number of susceptible sites and the detectability of mutations at such sites, along with the fraction of mutations that could actually be attributable to the target locus when possible. The latter scaling involved extrapolations from nontarget species in some cases. The reader should be aware that the estimates cited below have many sources of error, particular in the case of microbial species, where the estimates are based on reporter constructs, which in some cases have very small target sizes.

Specific details follow for each taxon reported on in Figure 1.

### RNA Viruses:

**Chrysanthemum chlorotic mottle viroid** Gago et al. (2009) estimate the total mutation rate per site to be  $2500000 \times 10^{-9}$ . After correcting for the estimated sequencing error rate noted by the authors, and further noting that 4 of 15 observed mutations involved insertion/deletions, the rate for base-substitutions mutations is  $u_{BS} = 1850000 \times 10^{-9}$ .

**ϕ6**.  $u_{BS} = 1461 \times 10^{-9}$ . From an experiment involving nearly complete genome sequencing by Burch et al. (2007), after accounting for genome size and the fraction of total mutations involving single-base substitutions (52/53), an estimate of  $222 \times 10^{-9}$  is obtained. Chao et al. (2002) give an earlier (and much higher) estimate based on reversions of a single amber mutation,  $2700 \times 10^{-9}$ . The average of these two estimates is used here.

**Poliovirus**.  $u_{BS} = 3920 \times 10^{-9}$ . Obtained directly from the genome-wide estimate in Table 1 of Drake and Holland (1999), after dividing by the genome size and 1.462 to account for the estimated fraction of indel mutations given by the authors.

**Measles virus**.  $u_{BS} = 3920 \times 10^{-9}$ . Obtained directly from the genome-wide estimate in Table 1 of Drake and Holland (1999), after dividing by the genome size and 1.462 to account for the estimated fraction of indel mutations given by the authors.

**Rhinovirus**.  $u_{BS} = 6430 \times 10^{-9}$ . Obtained directly from the genome-wide estimate in Table 1 of Drake and Holland (1999), after dividing by the genome size and 1.462 to account for the estimated fraction of indel mutations given by the authors.

**Vesicular stomatitis virus**.  $u_{BS} = 6800 \times 10^{-9}$ . Obtained directly from the genome-wide estimate in Table 1 of Drake and Holland (1999), after dividing by the genome size and 1.462 to account for the estimated fraction of indel mutations given by the authors.

**Tobacco mosaic virus**.  $u_{BS} = 603 \times 10^{-9}$ . Obtained directly from the estimate provided by Malpica et al. (2002), after accounting for the fraction of expected base-substitutional mutations (52.6/76.6 after correcting for detectability of base substitutions).

### Single-stranded DNA Viruses:

**ΦX174**.  $u_{BS} = 1404 \times 10^{-9}$ . Data taken directly from Cuevas et al. (2009), averaging their own rate estimate and those from other studies, all of which are in good agreement with each other.

**Bacteriophage M13**.  $u_{BS} = 654.7 \times 10^{-9}$ . Drake (1991) provides a total per-site mutation rate estimate for the LacZ locus. Of the observed mutations, 50 were indels, and another 117 were base substitutions, which scale up to an expected value of 479 assuming an average detectability of ~0.14 (an average from human data, Lynch 2010). The rate of base-substitutional mutation per site was then taken to be (479/529) times the total rate.

### Double-stranded DNA Viruses and Phage:

**Herpes simplex virus**.  $u_{BS} = 12.42 \times 10^{-9}$ . Drake and Hwang (2005) provide a total per-locus mutation rate estimate for thymidine kinase, which is 1128 bp in length. The detected mutations included 45 indels,

5 nonsense, and 17 missense base substitutions. After applying a detectability of base substitutions of 0.206 and assuming that all indels are detectable (as done in the following taxa as well), an estimated number of 107 actual base substitutions is inferred, and the per-site mutation rate was derived by scaling the per-locus rate by the locus size and the expected fraction of base substitutions.

**Bacteriophage lambda.**  $u_{BS} = 58.40 \times 10^{-9}$ . Drake (1991) provides a total per-site mutation rate estimate for the cI prophage suppressor gene. Of the observed mutations, 111 were indels, and 16 were nonsense and 4 were missense base substitutions. With a detectability of base substitutions at this locus of 0.059, 341 are expected to have actually occurred. The base-substitutional mutation rate was then estimated to be (341/452) times the total rate.

**Bacteriophage T4.**  $u_{BS} = 14.51 \times 10^{-9}$ . Drake (1991) provides a total per-site mutation rate estimate for the cI prophage suppressor gene. Of the observed mutations, 94 were indels, and after correcting for the detectability using a factor of 0.1125, 240 base substitutions were expected to have occurred. The base-substitutional mutation rate was then estimated to be (240/334) times the total rate.

**Bacteriophage T2.**  $u_{BS} = 19.40 \times 10^{-9}$ . Drake (1991) provides a total per-site mutation rate estimate and mutational spectrum data for the rII locus. The base-substitutional mutation rate was then estimated in the same manner as for bacteriophage T4.

#### **Eubacteria:**

**Bacillus anthracis.**  $u_{BS} = 0.21 \times 10^{-9}$ . The average per-locus mutation rate at the RpoB locus from three studies (Vogler et al. 2002; Zeibell et al. 2007; Yang and Miller 2008) is  $1.79 \times 10^{-9}$ , and the survey from these studies indicate that only 14 sites are involved. The method only detects base-substitution mutations, the detectability of which can be estimated from extensive work in *E. coli* that indicates 79 detectable mutation types over a total of 43 sites, yielding  $79/(3 \times 43) = 0.612$  detectability (the three accounting for the three possible mutation types per site) (Wolff et al. 2004). [This estimate of detectability is used in other studies, cited below, that rely on the RpoB locus, and should be interpreted with caution]. The per-site rate is then obtained by dividing the per-locus rate by  $(14 \times 0.612)$ .

**Bacillus subtilis.**  $u_{BS} = 0.74 \times 10^{-9}$ . The average per-locus mutation rate at the RpoB locus from two studies (Nicholson and Maughan 2002; Perkins et al. 2008) is  $6.32 \times 10^{-9}$ . From these studies and Rossolillo and Albertini (2001), mutations have only been found at nine sites. The per-site mutation rate estimate was obtained using the same corrections as for *B. anthracis*.

**Buchnera aphidicola.**  $u_{BS} = 4.00 \times 10^{-9}$ . Rate taken directly from Moran et al. (2009).

**Deinococcus radiodurans.**  $u_{BS} = 1.69 \times 10^{-9}$ . The average per-locus mutation rate at the RpoB locus from two studies (Kim et al. 2004; Menecier et al. 2004) is  $22.75 \times 10^{-9}$ , and from these studies 22 sites are known to exhibit detectable mutations. The per-site rate was estimated by assuming 22 sites and a detectability of 0.612 (as in *E. coli*).

**Escherichia coli.**  $u_{BS} = 0.26 \times 10^{-9}$ . Taken from the summary estimate for reporter genes in Lynch (2006).

**Helicobacter pylori.**  $u_{BS} = 2.72 \times 10^{-9}$ . Mutation-rate estimates for three loci were averaged. 1) The average per-locus mutation rate at the RpoB locus from two studies (Wang et al. 2001; Eutsey et al. 2007) is  $7.65 \times 10^{-9}$ , and assuming 43 sites and a detectability of 0.612 (as in *E. coli*), the estimated mutation rate is  $0.29 \times 10^{-9}$ . 2) The per-locus mutation rate at the GyrA locus is  $11.0 \times 10^{-9}$  (Wang et al. 2001, and only two sites appear to yield mutations, each with 0.67 detectability. After noting that 9% of putative

mutations at this locus are not located there (Moore et al. 1995), the estimated mutation rate is  $7.47 \times 10^{-9}$ . 3) The per-locus mutation rate for clarithromycin resistance at the 23s rRNA is  $0.80 \times 10^{-9}$ , but the effective number of sites is only two, so the per-locus rate is  $0.40 \times 10^{-9}$ .

***Mycobacterium fortuitum***.  $u_{BS} = 1.32 \times 10^{-9}$ . Mutation-rate estimates were available from Gillespie et al. (2005) for RpoB and GyrA, which were corrected to per-site rates using the parameters noted above for *Helicobacter*, yielding  $2.55 \times 10^{-9}$  and  $0.10 \times 10^{-9}$ , respectively.

***Mycobacterium tuberculosis***.  $u_{BS} = 0.19 \times 10^{-9}$ . The average per-locus mutation rate at the RpoB locus from two studies (Werngren and Hoffner 2003; Mariam et al. 2004) is  $2.13 \times 10^{-9}$ , and the data from these studies and Morlock et al. (2000) suggest that only a fraction 0.66 of rifampicin-resistance mutations are actually found at the locus, and that only three codons are involved. Letting the number of sites be 12 and the detectability be 0.612 (as in *E. coli*), the estimated mutation rate is  $0.29 \times 10^{-9}$ .

***Pseudomonas aeruginosa***.  $u_{BS} = 0.84 \times 10^{-9}$ . The mutation rate per locus for FosA is  $56.5 \times 10^{-9}$  (Rodríguez-Rojas and Blázquez 2009). According to Beharry and Palzkill (2005), two-thirds of the amino acids of the 135 residue protein are essential, so assuming 25% silent sites (a good approximation for most organisms), the target size is  $2/3 \times 3/4 \times 135 = 67.5$  nucleotides, and the rate per site is obtained by dividing the per-locus rate by this number.

***Salmonella enterica***.  $u_{BS} = 0.17 \times 10^{-9}$ . Mutation-rate estimates for two loci were averaged. 1) The average per-locus mutation rate at the RpoB locus from two studies (Hudson et al. 2002, 2003), one for rifampicin resistance and corrected assuming 43 sites and 0.612 detectability, and the other involving a single reversion and corrected by multiplying the per-locus rate by three to account for detectability at the site,  $0.13 \times 10^{-9}$ . 2) Hudson et al. (2002, 2003) give estimates for LacZ reversions, which requiring one specific base substitution, and multiplying the average of their per-locus rates by three to account for detectability yields a per-site rate of  $0.21 \times 10^{-9}$ .

***Salmonella typhimurium***.  $u_{BS} = 0.15 \times 10^{-9}$ . Data allowing three mutation-rate estimates are available in Hughes and Andersson (1997). 1) The average per-locus mutation rate at the RpoB locus from two studies (Hughes and Andersson 1997; Lind and Andersson 2008) is  $2.47 \times 10^{-9}$ , which after assuming 43 sites and 0.612 detectability yields a per-site rate of  $0.09 \times 10^{-9}$ . 2) From Hughes and Andersson (1997), the rate of origin of histidine auxotrophy is  $0.5 \times 10^{-6}$ , and Hartman et al. (1971) note that 67.3% of mutations are base substitutions. Of the base substitutions analyzed, 28 of 140 were nonsense, so the base-substitution detectability is 0.234. Using a total target size is 7389 bp from Drake (1991), the per-site rate is then  $0.21 \times 10^{-9}$ . 3) Hughes and Andersson (1997) also give a reversion rate for LacZ, which yields a per-site estimate of  $2.4 \times 10^{-9}$ . As this study is based on just one specific change at one site, and given the availability of more broadly sampling estimates, this estimate was not used in obtaining the final average.

***Thermus thermophilus***.  $u_{BS} = 0.14 \times 10^{-9}$ . Mackwan et al. (2008) selected for pyrimidine auxotrophs at the PyrE and PyrF loci, which together represent 1326 nucleotides of coding DNA. Here, the mutations had no detectable effects on fitness and no obvious phenotypic lag. Mutant sequencing indicates that 97.3% of detected mutants are actually represented at the locus. Correcting for this and averaging over two methods employed by the authors, the mutation rate per locus is  $321 \times 10^{-9}$ . With 24.7% of mutations being base substitutions, two of which were nonsense and 16 missense (implying a detectability of base substitutions of 0.422), the estimated per-site rate is  $(321 \times 10^{-9}) \times 0.973 \times 0.247 / (1326 \times 0.422) = 0.14 \times 10^{-9}$ .

**Archaea:**

***Haloferax volcanii***.  $u_{BS} = 0.02 \times 10^{-9}$ . Three per-locus mutation-rate estimates are available for the PyrE2 (Mackwan et al. 2007), but because mutations in this system exhibit phenotypic lag, only the higher estimate derived from a mutation-accumulation approach is used,  $58.7 \times 10^{-9}$ . Only 73.9% of mutations could be found molecularly at the locus, and of these 11.8% are base substitutions. The mutational target size is 531 bases, and assuming a detectability of 0.422 as in *T. thermophilus*, the base-substitutional mutation rate is estimated to be  $(58.7 \times 10^{-9}) \times 0.739 \times 0.118 / (531 \times 0.422) = 0.023 \times 10^{-9}$ . However, even this highest estimate likely a substantial estimate, as cells have a high ploidy level, which causes recessive mutations to be masked (Drake, pers. comm.), so the estimate for this species was not used.

***Sulfolobus acidocaldarius***.  $u_{BS} = 0.05 \times 10^{-9}$ . Jacobs and Grogan (1997) used 5-fluoro-orotic acid to select for pyrimidine auxotrophs at the PyrE and PyrF loci. FOA is not toxic, but the byproduct of action by these two genes is, so inactivation of this pathway eliminates toxicity. The aggregate estimate used here is based on the mutation rate from this and a second study (Grogan et al. 2001), and was calculated by Drake (2009) specifically for base-substitution mutations.

### Unicellular eukaryotes:

***Neurospora crassa***.  $u_{BS} = 4.66 \times 10^{-9}$ . Mutation-rate estimates for four loci were averaged. 1) Koh and Catchside (2007) provide an estimate for a single-site reversion to histidine utilization of  $10.5 \times 10^{-9}$ . 2) Three estimates of the per-locus mutation rate are available for the Mtr locus (methyl tryptophan resistance), which encodes a neutral amino-acid permease (Stadler et al. 1991). Scoring only uninucleate conidia (about one-fifth of the total), Chary et al. (1994) obtain an estimate of  $3.0 \times 10^{-7}$ ; frequencies of detected mutations are given by Watters and Stadler (1995), which can be converted to mutation rates, and after multiplying by 5.0 to correct for undetectable multinucleates, yields an estimate of  $7.0 \times 10^{-7}$ ; correcting for the fraction of undetectable multinucleates, the data of Dillon and Stadler (1994) yield an estimate of  $2.0 \times 10^{-7}$ . With an average per-locus rate of  $400 \times 10^{-9}$ , 32.4% of assayed mutations being base substitutions, a total coding sequence for the gene of 1413 bp, and employing a detectability of base substitutions of 0.143 (from the average of human genes (Lynch 2010), in the absence of the relevant information for *N. crassa*), the mutation rate per site is then  $(400 \times 10^{-9}) \times 0.324 / (1413 \times 0.143) = 0.64 \times 10^{-9}$ . 3) Dillon and Stadler (1994) give a reversion rate for one site in Trp-2 of  $1.1 \times 10^{-9}$ , which after multiplying by three, yields a per-site rate of  $3.3 \times 10^{-9}$ . 4) Two estimates are available for the per-locus rates at Ad-3a. Control data from Sakai et al. (2003) yield an estimate of  $240 \times 10^{-9}$ ; frequency data from de Serres et al. (1999) summed over the Ad-3a and Ad-3b regions yield an estimate of  $139 \times 10^{-9}$ , after accounting for the fact that only 24% of point mutations are at Ad-3a. Averaging over these two rates, and noting that Ad-3a is 924 bp in length, that 82% of mutations appear to be point changes (de Serres et al. 1995), and using Drake's (1991) factor of 3.55 to correct for limited abilities to detect mutations in sectoring colonies and the average detectability factor of 0.143 for human base-substitutional mutations, the per-site rate is estimated to be  $(190 \times 10^{-9}) \times 0.82 \times 3.55 / (924 \times 0.143) = 4.2 \times 10^{-9}$ .

***Plasmodium falciparum***.  $u_{BS} = 2.08 \times 10^{-9}$ . Paget-McNicol and Saul (2001) measure the rate of origin of mutations at the DHFR (dihydrofolate reductase) locus by evaluating the response to pyrimethamine selection. The authors developed a modeling approach to estimate the mutation rate, and taking the average from two experiments yields an average per-locus rate of  $1.390 \times 10^{-9}$ . Just two specific mutations are known to confer resistance, a leucine to serine at codon 46 (TTA to TCA) and a serine to asparagine (AGC to AAC) at codon 108. Assuming a target size for base substitutions of two nucleotides, and 1/3 of the mutations at those sites being detectable, the per-site mutation rate is obtained by dividing the per-locus rate by 2/3.

***Saccharomyces cerevisiae***.  $u_{BS} = 0.52 \times 10^{-9}$ . A per-site estimate based on complete-genome of  $0.33 \times 10^{-9}$  is available from Lynch et al. (2008), and this was simply average with the prior average estimate from reporter-construct studies,  $0.72 \times 10^{-9}$ , obtained from analyses in Lynch (2006) and Lang and Murray

(2008).

***Schizosaccharomyces pombe***.  $u_{BS} = 0.82 \times 10^{-9}$ . Estimates are available for two loci. 1) Studies on Ade6-485 detect a reversion at a single stop codon (3 sites), with 5/9 possible mutations giving a functional revertant, so dividing the total reversion rate by 5/3 gives the rate per site. The average rate over three studies (Kunz and Fleck 2001; Tournier et al. 2001; Holmberg et al. 2005) is  $1.35 \times 10^{-9}$ . 2) The average per-locus rate for Ura4/5 over several studies (Rudolph et al. 1999; Chang et al. 2001; Kunz and Fleck 2001; Fraser et al. 2003) is  $72.2 \times 10^{-9}$ . From Rudolph et al. (1999) and Fraser et al. (2003), 79% of mutations are base substitutions, and from Genbank the total coding-region target size is 1437 bp, so using the average detectability for human base substitutions (0.143), the per-site rate is estimated as  $(72.2 \times 10^{-9}) \times 0.79 / (1437 \times 0.143) = 0.28 \times 10^{-9}$ .

***Trypanosoma brucei***.  $u_{BS} = 1.65 \times 10^{-9}$ . Valdes et al. (1996) estimated the rate of origin of loss of functional mutations in the Herpes simplex virus thymidine kinase gene inserted into the *T. brucei* genome. Averaging over four experiments, the per-locus mutation rate estimated from the frequency of nonmutant containing cultures and the number of cells per culture subject to mutation, is  $532 \times 10^{-9}$ . From Genbank, the open-reading frame is 1130 bp in length, and the authors sequenced four mutant alleles and obtained two frameshifts, one missense substitution, and one nonsense substitution. Using the average human base-substitution detectability (0.143), the estimated per-site rate is then  $(532 \times 10^{-9}) \times 0.5 / (0.143 \times 1130)$ .

#### **Multicellular eukaryotes:**

***Arabidopsis thaliana***.  $u_{BS} = 6.50 \times 10^{-9}$ . Taken directly from a complete-genome sequencing project on mutation accumulation lines (Ossowski et al. 2009).

***Caenorhabditis elegans***.  $u_{BS} = 5.75 \times 10^{-9}$ . The average from two large projects, one involving complete-genome sequencing, evaluating mutation-accumulation lines (Denver et al. 2004, 2009).

***Drosophila melanogaster***.  $u_{BS} = 4.65 \times 10^{-9}$ . Taken directly from a complete-genome sequencing project on mutation accumulation lines Keightley et al. 2009).

***Homo sapiens***.  $u_{BS} = 12.85 \times 10^{-9}$ . Taken directly from a large-scale study inferring mutation rates indirectly from autosomal dominant and X-linked genes underlying monogenic human genetic disorders, and subjected to molecular surveys for causal mutations.

***Mus domesticus***.  $u_{BS} = 36.99 \times 10^{-9}$ . The estimate is the average derived from information from four types of studies. 1) Averaging over several visible markers and hundreds of thousands of observations, correcting for mosaics, and averaging over the sexes, data from Table 5 of Russell and Russell (1996) yield an average per-locus rate of  $7080 \times 10^{-9}$  per generation. From Mouse Genome Sequencing Consortium (2002), the average coding target size of these loci is 1320 bp. Assuming the average fraction of mutations that are base substitutions to be the same as in human monogenic disease-associated loci (0.504, from Lynch 2010) and an average detectability of 0.143, the per-site mutation rate is estimated as  $(7080 \times 10^{-9}) \times 0.504 / (1320 \times 0.143) = 18.90 \times 10^{-9}$ . 2) From Ono et al. (2000), the frequency of detectable mutations in the LacZ gene (transformed into mouse chromosomes) in the testes at the time of maturity is  $71000 \times 10^{-9}$ , and these numbers are quite constant throughout the lifespan of the mouse. From Russell and Russell (1996), the ratio of female to male mutations is 25:42, so the sex-averaged rate is obtained by multiplying the male rate by  $0.5[1+(25/42)] = 0.80$ . From Ono et al. (2000), 98.6% 67.3% of these are independent (as opposed to being possible clonal expansions), and 85.4% of mutations are base substitutions, so assuming a coding region of 3075 bp and an average base-substitution detectability as in humans (0.143), the mutation rate per site per generation is estimated to be  $(71000 \times 10^{-9}) \times 0.80 \times 0.986$

$\times 0.854 \times 0.673 / (3075 \times 0.143) = 73.20 \times 10^{-9}$ . 3) Averaging over several studies (Kohler et al. 1991; Dyaico et al. 1994; Nishino et al. 1996; Walter et al. 1998; Hill et al. 2004, 2005), the frequency of detectable mutations in the LacI gene (transformed into mouse chromosomes) in the testes at the time of maturity is  $11200 \times 10^{-9}$ . From Walter et al. (2004) and de Boer et al. (1997), 96.5% of putative mutations are found when the locus is sequenced, and from Dyaico et al. (1996) 71.4% of mutations are base substitutions, so correcting for sex bias and possible clonality of mutations, assuming a coding region of 1094 bp an average base-substitution detectability as in humans (0.143), the mutation rate per site per generation is estimated to be  $(11200 \times 10^{-9}) \times 0.80 \times 0.965 \times 0.714 \times 0.673 / (1094 \times 0.143) = 26.56 \times 10^{-9}$ . 4) Averaging over two studies (Masumura et al. 1999; Aoki et al. 2007), the frequency of detectable mutations in the Gpt gene (transformed into mouse chromosomes) in the testes at the time of maturity is  $4250 \times 10^{-9}$ . From several studies (Horiguchi et al. 1999; Masumura et al. 2000, 2003; Takeiri et al. 2003; Hashimoto et al. 2007; Ikeda et al. 2007; Yamauchi et al. 2008), 84.1% of mutations are base substitutions, so assuming all putative mutations reside at the locus, correcting for sex bias and possible clonality of mutations, assuming a coding region of 459 bp an average base-substitution detectability as in humans (0.143), the mutation rate per site per generation is estimated to be  $(4250 \times 10^{-9}) \times 0.80 \times 1.00 \times 0.841 \times 0.673 / (459 \times 0.143) = 29.32 \times 10^{-9}$ .

### References for Microbial and Germline Mutation-rate Estimates:

Aoki, Y., A. H. Hashimoto, K. Amanuma, M. Matsumoto, K. Hiyoshi, H. Takano, K. Masumura, K. Itoh, T. Nohmi, and M. Yamamoto. 2007. Enhanced spontaneous and benzo(a)pyrene-induced mutations in the lung of Nrf2-deficient gpt delta mice. *Cancer Res.* 67: 5643-5648.

Beharry, Z., and T. Palzkill. 2005. Functional analysis of active site residues of the fosfomycin resistance enzyme FosA from *Pseudomonas aeruginosa*. *J. Biol. Chem.* 280: 17786-177891.

Burch, C. L., S. Guyader, D. Samarov, and H. Shen. 2007. Experimental estimate of the abundance and effects of nearly neutral mutations in the RNA virus  $\phi 6$ . *Genetics* 176: 467-476.

Chang, D.-Y., Y. Gu, and A.-L. Lu. 2001. Fission yeast (*Schizosaccharomyces pombe*) cells defective in the MutY-homologous glycosylase activity have a mutator phenotype and are sensitive to hydrogen peroxide. *Mol. Genet. Genomics* 266: 336-342.

Chao, L., C. U. Rang, and L. E. Wong. 2002. Distribution of spontaneous mutants and inferences about the replication mode of the RNA bacteriophage  $\phi 6$ . *J. Virol.* 76: 3276-3281.

Chary, P., D. Dillon, A. L. Schroeder, and D. O. Natvig. 1994. Superoxide dismutase (sod-1) null mutants of *Neurospora crassa*: oxidative stress sensitivity, spontaneous mutation rate and response to mutagens. *Genetics* 137: 723-730.

Cuevas, J. M., S. Duffy, and R. Sanjuán. 2009. Point mutation rate of bacteriophage  $\Phi X174$ . *Genetics* 183: 747-749.

de Boer, J. G., H. Erfle, D. Walsh, J. Holcroft, J. S. Provost, B. Rogers, K. R. Tindall, and B. W. Glickman. 1997. Spectrum of spontaneous mutations in liver tissue of lacI transgenic mice. *Environ. Mol. Mutagen.* 30: 273-286.

Denver, D. R., P. C. Dolan, L. J. Wilhelm, W. Sung, J. I. Lucas-Lledó, D. K. Howe, S. C. Lewis, K. Okamoto, W. K. Thomas, M. Lynch, and C. F. Baer. 2009. A genome-wide view of *Caenorhabditis elegans* base substitution mutation processes. *Proc. Natl. Acad. Sci. USA* 106: 16310-16314.

Denver, D. R., K. Morris, M. Lynch, and W. K. Thomas. 2004. High mutation rate and predominance of insertions in the *Caenorhabditis elegans* nuclear genome. *Nature* 430: 679-682.

de Serres, F. J., and H. E. Brockman. 1999. Comparison of the spectra of genetic damage in formaldehyde-induced ad-3 mutations between DNA repair-proficient and -deficient heterokaryons of *Neurospora crassa*. *Mutat. Res.* 437: 151-163.

de Serres, F. J., H. V. Malling, B. B. Webber, and H. E. Brockman. 1995. Quantitative and qualitative aspects of spontaneous specific-locus mutation in the ad-3 region of heterokaryon 12 of *Neurospora crassa*. *Mutat. Res.* 332: 45-54.

Dillon, D., and D. Stadler. 1994. Spontaneous mutation at the mtr locus in *Neurospora*: the molecular spectrum in wild-type and a mutator strain. *Genetics* 138: 61-74.

Drake, J. W. 1991. A constant rate of spontaneous mutation in DNA-based microbes. *Proc. Natl. Acad. Sci. USA* 88: 7160-7164.

Drake, J. W. 2009. Avoiding dangerous missense: thermophiles display especially low mutation rates. *PLoS Genet.* 5(6):e1000520.

Drake, J. W., and J. J. Holland. 1999. Mutation rates among RNA viruses. *Proc. Natl. Acad. Sci. USA* 96: 13910-13913.

Drake, J. W., and C. B. Hwang. 2005. On the mutation rate of herpes simplex virus type 1. *Genetics* 170: 969-970.

Dyaico, M. J., G. S. Provost, P. L. Kretz, S. L. Ransom, J. C. Moores, and J. M. Short. 1994. The use of shuttle vectors for mutation analysis in transgenic mice and rats. *Mutat. Res.* 307: 461-478.

Dyaico, M. J., G. R. Stuart, G. M. Tobal, J. G. de Boer, B. W. Glickman, and G. S. Provost. 1996. Species-specific differences in hepatic mutant frequency and mutational spectrum among lambda/lacI transgenic rats and mice following exposure to aflatoxin B1. *Carcinogenesis* 17: 2347-2356.

Eutsey, R., G. Wang, and R. J. Maier. 2007. Role of a MutY DNA glycosylase in combating oxidative DNA damage in *Helicobacter pylori*. *DNA Repair* 6: 19-26.

Fraser, J. L., E. Neill, and S. Davey. 2003. Fission yeast Uve1 and Apn2 function in distinct oxidative damage repair pathways *in vivo*. *DNA Repair* 2: 1253-1267.

Gago, S., S. F. Elena, R. Flores, and R. Sanjuán. 2009. Extremely high mutation rate of a hammerhead viroid. *Science* 323: 1308.

Gillespie, S. H., S. Basu, A. L. Dickens, D. M. O'Sullivan, and T. D. McHugh. 2005. Effect of subinhibitory concentrations of ciprofloxacin on *Mycobacterium fortuitum* mutation rates. *J. Antimicrob. Chemother.* 56: 344-348.

Grogan, D. W., G. T. Carver, and J. W. Drake. 2001. Genetic fidelity under harsh conditions: analysis of spontaneous mutation in the thermoacidophilic archaeon *Sulfolobus acidocaldarius*. *Proc. Natl. Acad. Sci. USA* 98: 7928-7933.

Hartman, P. E., Z. Hartman, and R. C. Stahl. 1971. Classification and mapping of spontaneous and



induced mutations in the histidine operon of *Salmonella*. *Adv. Genet.* 16: 1-34.

Hashimoto, A. H., K. Amanuma, K. Hiyoshi, Y. Sugawara, S. Goto, R. Yanagisawa, H. Takano, K. Masumura, T. Nohmi, and Y. Aoki. 2007. Mutations in the lungs of gpt delta transgenic mice following inhalation of diesel exhaust. *Environ. Mol. Mutagen.* 48: 682-693.

Hill, K. A., V. L. Buettner, A. Halangoda, M. Kunishige, S. R. Moore, J. Longmate, W. A. Scaringe, and S. S. Sommer. 2004. Spontaneous mutation in Big Blue mice from fetus to old age: tissue-specific time courses of mutation frequency but similar mutation types. *Environ. Mol. Mutagen.* 243: 110-120.

Hill, K. A., A. Halangoda, P. W. Heinmoeller, K. Gonzalez, C. Chitaphan, J. Longmate, W. A. Scaringe, J. C. Wang, and S. S. Sommer. 2005. Tissue-specific time courses of spontaneous mutation frequency and deviations in mutation pattern are observed in middle to late adulthood in Big Blue mice. *Environ. Mol. Mutagen.* 45: 442-454.

Holmberg, C., O. Fleck, H. A. Hansen, C. Liu, R. Slaaby, A. M. Carr, and O. Nielsen. 2005. Ddb1 controls genome stability and meiosis in fission yeast. *Genes Dev.* 19: 853-862.

Horiguchi, M., K. Masumura, H. Ikehata, T. Ono, Y. Kanke, T. Sofuni, and T. Nohmi. 1999. UVB-induced gpt mutations in the skin of gpt delta transgenic mice. *Environ. Mol. Mutagen.* 34: 72-79.

Hudson, R. E., U. Bergthorsson, and H. Ochman. 2003. Transcription increases multiple spontaneous point mutations in *Salmonella enterica*. *Nucleic Acids Res.* 31: 4517-4522.

Hudson, R. E., U. Bergthorsson, J. R. Roth, and H. Ochman. 2002. Effect of chromosome location on bacterial mutation rates. *Mol. Biol. Evol.* 19: 85-92.

Hughes, D., and D. I. Andersson. 1997. Carbon starvation of *Salmonella typhimurium* does not cause a general increase of mutation rates. *J. Bacteriol.* 179: 6688-6691.

Ikeda, M., K. Masumura, Y. Sakamoto, B. Wang, M. Neno, K. Sakuma, I. Hayata, and T. Nohmi. 2007. Combined genotoxic effects of radiation and a tobacco-specific nitrosamine in the lung of gpt delta transgenic mice. *Mutat. Res.* 626: 15-25.

Jacobs, K. L., and D. W. Grogan. 1997. Rates of spontaneous mutation in an archaeon from geothermal environments. *J. Bacteriol.* 179: 3298-3230

Keightley, P. D., U. Trivedi, M. Thomson, F. Oliver, S. Kumar, and M. L. Blaxter. 2009. Analysis of the genome sequences of three *Drosophila melanogaster* spontaneous mutation accumulation lines. *Genome Res.* 19: 1195-1201.

Koh, L. Y., and D. E. Catcheside. 2007. Mutation of msh-2 in *Neurospora crassa* does not reduce the incidence of recombinants with multiple patches of donor chromosome sequence. *Fungal Genet. Biol.* 44: 575-584.

Kohler, S. W., G. S. Provost, A. Fieck, P. L. Kretz, W. O. Bullock, J. A. Sorge, D. L. Putman, and J. M. Short. 1991. Spectra of spontaneous and mutagen-induced mutations in the lacI gene in transgenic mice. *Proc. Natl. Acad. Sci. USA* 88: 7958-7962.

Kunz, C., and O. Fleck. 2001. Role of the DNA repair nucleases Rad13, Rad2 and Uve1 of *Schizosaccharomyces pombe* in mismatch correction. *J. Mol. Biol.* 313: 241-253.

- Lang, G. I., and A. W. Murray. 2008. Estimating the per-base-pair mutation rate in the yeast *Saccharomyces cerevisiae*. *Genetics* 178: 67-82.
- Lind, P. A., and D. I. Andersson. 2008. Whole-genome mutational biases in bacteria. *Proc. Natl. Acad. Sci. USA* 105: 17878-17883.
- Lynch, M. 2006. The origins of eukaryotic gene structure. *Mol. Biol. Evol.* 23: 450-468.
- Lynch, M. 2010. The rate, molecular spectrum, and consequences of human mutation. *Proc. Natl. Acad. Sci. USA* (in press).
- Kim, M., E. Wolff, T. Huang, L. Garibyan, A. M. Earl, J. R. Battista, and J. H. Miller. 2004. Developing a genetic system in *Deinococcus radiodurans* for analyzing mutations. *Genetics* 166: 661-668.
- Mackwan, R. R., G. T. Carver, J. W. Drake, and D. W. Grogan. 2007. An unusual pattern of spontaneous mutations recovered in the halophilic archaeon *Haloferax volcanii*. *Genetics* 176: 697-702.
- Mackwan, R. R., G. T. Carver, G. E. Kissling, J. W. Drake, and D. W. Grogan. 2008. The rate and character of spontaneous mutation in *Thermus thermophilus*. *Genetics* 180: 17-25.
- Malpica, J. M., A. Fraile, I. Moreno, C. I. Obies, J. W. Drake, F. García-Arenal. 2002. The rate and character of spontaneous mutation in an RNA virus. *Genetics* 162: 1505-1511.
- Mariam, D. H., Y. Mengistu, S. E. Hoffner, and D. I. Andersson. 2004. Effect of rpoB mutations conferring rifampin resistance on fitness of *Mycobacterium tuberculosis*. *Antimicrob. Agents Chemother.* 48: 1289-1294.
- Masumura, K., K. Matsui, M. Yamada, M. Horiguchi, K. Ishida, M. Watanabe, O. Ueda, H. Suzuki, Y. Kanke, K. R. Tindall, K. Wakabayashi, T. Sofuni, and T. Nohmi. 1999. Mutagenicity of 2-amino-1-methyl-6-phenylimidazo [4,5-b]pyridine (PhIP) in the new gpt delta transgenic mouse. *Cancer Lett.* 143: 241-244.
- Masumura, K., K. Matsui, M. Yamada, M. Horiguchi, K. Ishida, M. Watanabe, K. Wakabayashi, and T. Nohmi. 2000. Characterization of mutations induced by 2-amino-1-methyl-6-phenylimidazo[4,5-b]pyridine in the colon of gpt delta transgenic mouse: novel G:C deletions beside runs of identical bases. *Carcinogenesis* 21: 2049-2056.
- Masumura, K., Y. Totsuka, K. Wakabayashi, and T. Nohmi. 2003. Potent genotoxicity of aminophenylnorharman, formed from non-mutagenic norharman and aniline, in the liver of gpt delta transgenic mouse. *Carcinogenesis* 24: 1985-1993.
- Menecier, S., G. Coste, P. Servant, A. Bailone, and S. Sommer. 2004. Mismatch repair ensures fidelity of replication and recombination in the radioresistant organism *Deinococcus radiodurans*. *Mol. Genet. Genomics* 272: 460-469.
- Moore, R. A., B. Beckthold, S. Wong, A. Kureishi, and L. E. Bryan. 1995. Nucleotide sequence of the gyrA gene and characterization of ciprofloxacin-resistant mutants of *Helicobacter pylori*. *Antimicrob. Agents Chemother.* 39: 107-111.
- Moran, N. A., H. J. McLaughlin, and R. Sorek. 2009. The dynamics and time scale of ongoing genomic

erosion in symbiotic bacteria. *Science* 323: 379-382.

Morlock, G. P., B. B. Plikaytis, and J. T. Crawford JT. 2000. Characterization of spontaneous, *in vitro*-selected, rifampin-resistant mutants of *Mycobacterium tuberculosis* strain H37Rv. *Antimicrob. Agents Chemother.* 44: 3298-3301.

Mouse Genome Sequencing Consortium. 2002. Initial sequencing and comparative analysis of the mouse genome. *Nature* 420: 520-562.

Nicholson, W. L., and H. Maughan. 2002. The spectrum of spontaneous rifampin resistance mutations in the *rpoB* gene of *Bacillus subtilis* 168 spores differs from that of vegetative cells and resembles that of *Mycobacterium tuberculosis*. *J. Bacteriol.* 184: 4936-4940.

Nishino, H., D. J. Schaid, V. L. Buettner, J. Haavik, and S. S. Sommer. 1996. Mutation frequencies but not mutant frequencies in Big Blue mice fit a Poisson distribution. *Environ. Mol. Mutagen.* 28: 414-417.

Ono, T., H. Ikehata, S. Nakamura, Y. Saito, Y. Hosoi, Y. Takai, S. Yamada, J. Onodera, and K. Yamamoto. 2000. Age-associated increase of spontaneous mutant frequency and molecular nature of mutation in newborn and old *lacZ*-transgenic mouse. *Mutat. Res.* 447: 165-177.

Ossowski, S., K. Schneeberger, J. Lucas-Lledó, N. Warthmann, R. M. Clark, R. G. Shaw, D. Weigel, and M. Lynch. 2009. The rate and molecular spectrum of spontaneous mutations in *Arabidopsis thaliana*. *Science* (in press).

Paget-McNicol, S., and A. Saul. 2001. Mutation rates in the dihydrofolate reductase gene of *Plasmodium falciparum*. *Parasitology* 122: 497-505.

Perkins, A. E., A. C. Schuerger, and W. L. Nicholson. 2008. Isolation of *rpoB* mutations causing rifampicin resistance in *Bacillus subtilis* spores exposed to simulated Martian surface conditions. *Astrobiology* 8: 1159-1167.

Rodríguez-Rojas, A., and J. Blázquez. 2009. The *Pseudomonas aeruginosa* *pfpI* gene plays an antimutator role and provides general stress protection. *J. Bacteriol.* 191: 844-850.

Rossolillo, P., and A. M. Albertini. 2001. Functional analysis of the *Bacillus subtilis* *yshD* gene, a *mutS* paralog. *Mol. Gen. Genet.* 264: 809-818.

Rudolph, C., C. Kunz, S. Parisi, E. Lehmann, E. Hartsuiker, B. Fartmann, W. Kramer, J. Kohli, and O. Fleck. 1999. The *msh2* gene of *Schizosaccharomyces pombe* is involved in mismatch repair, mating-type switching, and meiotic chromosome organization. *Mol. Cell. Biol.* 19: 241-250.

Russell, L. B., and W. L. Russell. 1996. Spontaneous mutations recovered as mosaics in the mouse specific-locus test. *Proc. Natl. Acad. Sci. USA* 93: 13072-13077.

Stadler, D., H. Macleod, and D. Dillon. 1991. Spontaneous mutation at the *mtr* locus of *Neurospora*: the spectrum of mutant types. *Genetics* 129: 39-45.

Takeiri, A., M. Mishima, K. Tanaka, A. Shioda, O. Ueda, H. Suzuki, M. Inoue, K. Masumura, and T. Nohmi. 2003. Molecular characterization of mitomycin C-induced large deletions and tandem-base substitutions in the bone marrow of *gpt delta* transgenic mice. *Chem. Res. Toxicol.* 16: 171-179.

- Tournier, S., D. Leroy, F. Goubin, B. Ducommun, and J. S. Hyams. 1996. Heterologous expression of the human cyclin-dependent kinase inhibitor p21Cip1 in the fission yeast, *Schizosaccharomyces pombe* reveals a role for PCNA in the chk1+ cell cycle checkpoint pathway. *Mol. Biol. Cell.* 7: 651-662.
- Valdés, J., M. C. Taylor, M. A. Cross, M. J. Ligtenberg, G. Rudenko, and P. Borst. 1996. The viral thymidine kinase gene as a tool for the study of mutagenesis in *Trypanosoma brucei*. *Nucleic Acids Res.* 24: 1809-1815.
- Vogler, A. J., J. D. Busch, S. Percy-Fine, C. Tipton-Hunton, K. L. Smith, and P. Keim. 2002. Molecular analysis of rifampin resistance in *Bacillus anthracis* and *Bacillus cereus*. *Antimicrob. Agents Chemother.* 46: 511-513.
- Walter, C. A., G. W. Intano, J. R. McCarrey, C. A. McMahan, and R. B. Walter. 1998. Mutation frequency declines during spermatogenesis in young mice but increases in old mice. *Proc. Natl. Acad. Sci. USA* 95: 10015-10019.
- Walter, C. A., G. W. Intano, C. A. McMahan, K. Kelner, J. R. McCarrey, and R. B. Walter. 2004. Mutation spectral changes in spermatogenic cells obtained from old mice. *DNA Repair* 3: 495-504.
- Wang, G., T. J. Wilson, Q. Jiang, and D. E. Taylor. 2001. Spontaneous mutations that confer antibiotic resistance in *Helicobacter pylori*. *Antimicrob. Agents Chemother.* 45: 727-733.
- Watters, M. K., and D. R. Stadler. 1995. Spontaneous mutation during the sexual cycle of *Neurospora crassa*. *Genetics* 139: 137-145.
- Werngren, J., and S. E. Hoffner. 2003. Drug-susceptible *Mycobacterium tuberculosis* Beijing genotype does not develop mutation-conferred resistance to rifampin at an elevated rate. *J. Clin. Microbiol.* 41: 1520-1524.
- Wolff, E., M. Kim, K. Hu, H. Yang, and J. H. Miller. 2004. Polymerases leave fingerprints: analysis of the mutational spectrum in *Escherichia coli* rpoB to assess the role of polymerase IV in spontaneous mutation. *J. Bacteriol.* 186: 2900-2905.
- Yamauchi, K., S. Kakinuma, S. Sudo, S. Kito, Y. Ohta, T. Nohmi, K. Masumura, M. Nishimura, and Y. Shimada. 2008. Differential effects of low- and high-dose X-rays on N-ethyl-N-nitrosourea-induced mutagenesis in thymocytes of B6C3F1 gpt-delta mice. *Mutat. Res.* 640: 27-37.
- Yang, H., and J. H. Miller. 2008. Deletion of dnaN1 generates a mutator phenotype in *Bacillus anthracis*. *DNA Repair* 7: 507-514.
- Zeibell, K., S. Aguila, V. Yan Shi, A. Chan, H. Yang, and J. H. Miller. 2007. Mutagenesis and repair in *Bacillus anthracis*: the effect of mutators. *J. Bacteriol.* 189: 2331-2338.

## II. Rodent Somatic Mutation Rates.

Somatic mutation rates for the mouse reported in Table 1 and Figure 3 were obtained from observations on reporter constructs, using the same methods noted above for male germline mutation rates. Many of these estimates are derived from control data from experiments in environmental toxicology.

## References for Mouse Somatic Mutation-rate Estimates:

- Andrew, S. E., A. H. Reitmair, J. Fox, L. Hsiao, A. Francis, M. McKinnon, T. W. Mak, and F. R. Jirik. 1997. Base transitions dominate the mutational spectrum of a transgenic reporter gene in MSH2 deficient mice. *Oncogene* 15: 123-129.
- Aoki, Y., A. H. Hashimoto, K. Amanuma, M. Matsumoto, K. Hiyoshi, H. Takano, K. Masumura, K. Itoh, T. Nohmi, and M. Yamamoto. 2007. Enhanced spontaneous and benzo(a)pyrene-induced mutations in the lung of Nrf2-deficient gpt delta mice. *Cancer Res.* 67: 5643-5648.
- Baross-Francis, A., N. Makhani, R. M. Liskay, and F. R. Jirik. 2001. Elevated mutant frequencies and increased C:G→T:A transitions in Mlh1<sup>-/-</sup> versus Pms2<sup>-/-</sup> murine small intestinal epithelial cells. *Oncogene* 20: 619-625.
- Busuttill, R. A., A. M. Garcia, R. L. Reddick, M. E. Dollé, R. B. Calder, J. F. Nelson, and J. Vijg. 2007. Intra-organ variation in age-related mutation accumulation in the mouse. *PLoS One* 2: e876.
- Buettner, V. L., H. Nishino, J. Haavik, A. Knöll, K. Hill, and S. S. Sommer. 1997. Spontaneous mutation frequencies and spectra in p53 (+/+) and p53 (-/-) mice: a test of the 'guardian of the genome' hypothesis in the Big Blue transgenic mouse mutation detection system. *Mutat. Res.* 379: 13-20.
- Cunningham, M. L., J. J. Hayward, B. S. Shane, and K. R. Tindall. 1996. Distinction of mutagenic carcinogens from a mutagenic noncarcinogen in the big blue transgenic mouse. *Environ. Health Perspect.* 104 Suppl. 3: 683-686.
- de Boer, J. G., H. Erfle, D. Walsh, J. Holcroft, J. S. Provost, B. Rogers, K. R. Tindall, and B. W. Glickman. 1997. Spectrum of spontaneous mutations in liver tissue of lacI transgenic mice. *Environ. Mol. Mutagen.* 30: 273-286.
- de Boer, J. G., J. C. Mirsalis, G. S. Provost, K. R. Tindall, and B. W. Glickman. 1996. Spectrum of mutations in kidney, stomach, and liver from lacI transgenic mice recovered after treatment with tris(2,3-dibromopropyl)phosphate. *Environ. Mol. Mutagen.* 28: 418-423.
- de Boer, J. G., S. Provost, N. Gorelick, K. Tindall, and B. W. Glickman. 1998. Spontaneous mutation in lacI transgenic mice: a comparison of tissues. *Mutagenesis* 13: 109-114.
- Dollé, M. E., H. Giese, C. L. Hopkins, H. J. Martus, J. M. Hausdorff, and J. Vijg. 1997. Rapid accumulation of genome rearrangements in liver but not in brain of old mice. *Nat. Genet.* 17: 431-434.
- Dollé, M. E., W. K. Snyder, J. A. Gossen, P. H. Lohman, and J. Vijg. 2000. Distinct spectra of somatic mutations accumulated with age in mouse heart and small intestine. *Proc. Natl. Acad. Sci. USA* 97: 8403-8408.
- Dycaico, M. J., G. S. Provost, P. L. Kretz, S. L. Ransom, J. C. Moores, and J. M. Short. 1994. The use of shuttle vectors for mutation analysis in transgenic mice and rats. *Mutat. Res.* 307: 461-478.
- Dycaico, M. J., G. R. Stuart, G. M. Tobal, J. G. de Boer, B. W. Glickman, and G. S. Provost. 1996. Species-specific differences in hepatic mutant frequency and mutational spectrum among lambda/lacI transgenic rats and mice following exposure to aflatoxin B1. *Carcinogenesis* 17: 2347-2356.
- Hashimoto, A. H., K. Amanuma, K. Hiyoshi, Y. Sugawara, S. Goto, R. Yanagisawa, H. Takano, K.

Masumura, T. Nohmi, and Y. Aoki. 2007. Mutations in the lungs of gpt delta transgenic mice following inhalation of diesel exhaust. *Environ. Mol. Mutagen.* 48: 682-693.

Hill, K. A., V. L. Buettner, A. Halangoda, M. Kunishige, S. R. Moore, J. Longmate, W. A. Scaringe, and S. S. Sommer. 2004. Spontaneous mutation in Big Blue mice from fetus to old age: tissue-specific time courses of mutation frequency but similar mutation types. *Environ. Mol. Mutagen.* 243: 110-120.

Hill, K. A., A. Halangoda, P. W. Heinmoeller, K. Gonzalez, C. Chitaphan, J. Longmate, W. A. Scaringe, J. C. Wang, and S. S. Sommer. 2005. Tissue-specific time courses of spontaneous mutation frequency and deviations in mutation pattern are observed in middle to late adulthood in Big Blue mice. *Environ. Mol. Mutagen.* 45: 442-454.

Horiguchi, M., K. Masumura, H. Ikehata, T. Ono, Y. Kanke, T. Sofuni, and T. Nohmi. 1999. UVB-induced gpt mutations in the skin of gpt delta transgenic mice. *Environ. Mol. Mutagen.* 34: 72-79.

Ikeda, M., K. Masumura, Y. Sakamoto, B. Wang, M. Neno, K. Sakuma, I. Hayata, and T. Nohmi. 2007. Combined genotoxic effects of radiation and a tobacco-specific nitrosamine in the lung of gpt delta transgenic mice. *Mutat. Res.* 626: 15-25.

Kohler, S. W., G. S. Provost, A. Fieck, P. L. Kretz, W. O. Bullock, J. A. Sorge, D. L. Putman, and J. M. Short. 1991. Spectra of spontaneous and mutagen-induced mutations in the lacI gene in transgenic mice. *Proc. Natl. Acad. Sci. USA* 88: 7958-7962.

Lee, A. T., C. DeSimone, A. Cerami, and R. Buca. 1994. Comparative analysis of DNA mutations in lacI transgenic mice with age. *FASEB J.* 8: 545-550.

Masumura, K., K. Matsui, M. Yamada, M. Horiguchi, K. Ishida, M. Watanabe, O. Ueda, H. Suzuki, Y. Kanke, K. R. Tindall, K. Wakabayashi, T. Sofuni, and T. Nohmi. 1999. Mutagenicity of 2-amino-1-methyl-6-phenylimidazo [4,5-b]pyridine (PhIP) in the new gpt delta transgenic mouse. *Cancer Lett.* 143: 241-244.

Masumura, K., K. Matsui, M. Yamada, M. Horiguchi, K. Ishida, M. Watanabe, K. Wakabayashi, and T. Nohmi. 2000. Characterization of mutations induced by 2-amino-1-methyl-6-phenylimidazo[4,5-b]pyridine in the colon of gpt delta transgenic mouse: novel G:C deletions beside runs of identical bases. *Carcinogenesis* 21: 2049-2056.

Masumura, K., Y. Totsuka, K. Wakabayashi, and T. Nohmi. 2003. Potent genotoxicity of aminophenylnorharman, formed from non-mutagenic norharman and aniline, in the liver of gpt delta transgenic mouse. *Carcinogenesis* 24: 1985-1993.

Monroe, J. J., K. L. Kort, J. E. Miller, D. R. Marino, and T. R. Skopek. 1998. A comparative study of *in vivo* mutation assays: analysis of hprt, lacI, cII/cI and as mutational targets for N-nitroso-N-methylurea and benzo[a]pyrene in Big Blue mice. *Mutat. Res.* 421: 121-136.

Mouse Genome Sequencing Consortium. 2002. Initial sequencing and comparative analysis of the mouse genome. *Nature* 420: 520-562.

Nishino, H., D. J. Schaid, V. L. Buettner, J. Haavik, and S. S. Sommer. 1996. Mutation frequencies but not mutant frequencies in Big Blue mice fit a Poisson distribution. *Environ. Mol. Mutagen.* 28: 414-417.

Ono, T., H. Ikehata, S. Nakamura, Y. Saito, Y. Hosoi, Y. Takai, S. Yamada, J. Onodera, and K.

Yamamoto. 2000. Age-associated increase of spontaneous mutant frequency and molecular nature of mutation in newborn and old lacZ-transgenic mouse. *Mutat. Res.*447: 165-177.

Paashuis-Lew, Y. R., and J. A. Heddle. 1998. Spontaneous mutation during fetal development and post-natal growth. *Mutagenesis* 13: 613-617.

Russell, L. B., and W. L. Russell. 1996. Spontaneous mutations recovered as mosaics in the mouse specific-locus test. *Proc. Natl. Acad. Sci. USA* 93: 13072-13077.

Skopek, T. R., K. L. Kort, and D. R. Marino. 1995. Relative sensitivity of the endogenous hprt gene and lacI transgene in ENU-treated Big Blue B6C3F1 mice. *Environ. Mol. Mutagen.* 26: 9-15.

Takeiri, A., M. Mishima, K. Tanaka, A. Shioda, O. Ueda, H. Suzuki, M. Inoue, K. Masumura, and T. Nohmi. 2003. Molecular characterization of mitomycin C-induced large deletions and tandem-base substitutions in the bone marrow of gpt delta transgenic mice. *Chem. Res. Toxicol.* 16: 171-179.

Walker, V. E., N. J. Gorelick, J. L. Andrews, T. R. Craft, J. G. deBoer, B. W. Glickman, and T. R. Skopek. 1996. Frequency and spectrum of ethylnitrosourea-induced mutation at the hprt and lacI loci in splenic lymphocytes of exposed lacI transgenic mice. *Cancer Res.* 56: 4654-4661.

Walter, C. A., G. W. Intano, J. R. McCarrey, C. A. McMahan, and R. B. Walter. 1998. Mutation frequency declines during spermatogenesis in young mice but increases in old mice. *Proc. Natl. Acad. Sci. USA* 95: 10015-10019.

Walter, C. A., G. W. Intano, C. A. McMahan, K. Kelner, J. R. McCarrey, and R. B. Walter. 2004. Mutation spectral changes in spermatogenic cells obtained from old mice. *DNA Repair* 3: 495-504.

Yamauchi, K., S. Kakinuma, S. Sudo, S. Kito, Y. Ohta, T. Nohmi, K. Masumura, M. Nishimura, and Y. Shimada. 2008. Differential effects of low- and high-dose X-rays on N-ethyl-N-nitrosourea-induced mutagenesis in thymocytes of B6C3F1 gpt-delta mice. *Mutat. Res.* 640: 27-37.

### **References for Rat Somatic Mutation-rate Estimates:**

Bol SA, Horlbeck J, Markovic J, de Boer JG, Turesky RJ, Constable A. 2000. Mutational analysis of the liver, colon and kidney of Big Blue rats treated with 2-amino-3-methylimidazo[4,5-f]quinoline. *Carcinogenesis* 21: 1-6.

Bottin MC, Gate L, Rihn B, Micillino JC, Nathalie M, Martin A, Nunge H, Morel G, Wrobel R, Ayi-Fanou L, Champmartin C, Keith G, Binet S. 2006. Genotoxic effects of bitumen fumes in Big Blue transgenic rat lung. *Mutat. Res.* 596: 91-105.

Boyiri T, Guttenplan J, Khmel'nitsky M, Kosinska W, Lin JM, Desai D, Amin S, Pittman B, El-Bayoumy K. 2004. Mammary carcinogenesis and molecular analysis of in vivo cII gene mutations in the mammary tissue of female transgenic rats treated with the environmental pollutant 6-nitrochrysene. *Carcinogenesis* 25: 637-643.

Chen T, Aidoo A, Manjanatha MG, Mittelstaedt RA, Shelton SD, Lyn-Cook LE, Casciano DA, Heflich RH. 1998. Comparison of mutant frequencies and types of mutations induced by thiopepa in the endogenous Hprt gene and transgenic lacI gene of Big Blue rats. *Mutat. Res.* 403: 199-214.

Chen T, Gamboa da Costa G, Marques MM, Shelton SD, Beland FA, Manjanatha MG. 2002. Mutations

induced by alpha-hydroxytamoxifen in the lacI and cII genes of Big Blue transgenic rats. *Carcinogenesis* 23: 1751-1757.

Chen T, Hutts RC, Mei N, Liu X, Bishop ME, Shelton S, Manjanatha MG, Aidoo A. 2005. Endogenous estrogen status, but not genistein supplementation, modulates 7,12-dimethylbenz[a]anthracene-induced mutation in the liver cII gene of transgenic big blue rats. *Environ. Mol. Mutagen.* 45: 409-418.

Chen L, Mei N, Yao L, Chen T. 2006. Mutations induced by carcinogenic doses of aristolochic acid in kidney of Big Blue transgenic rats. *Toxicol. Lett.* 165: 250-256.

Chen T, Mittelstaedt RA, Aidoo A, Hamilton LP, Beland FA, Casciano DA, Heflich RH. 2001. Comparison of hprt and lacI mutant frequency with DNA adduct formation in N-hydroxy-2-acetylaminofluorene-treated Big Blue rats. *Environ. Mol. Mutagen.* 37: 195-202.

Chen T, Mittelstaedt RA, Shelton SD, Dass SB, Manjanatha MG, Casciano DA, Heflich RH. 2001. Gene- and tissue-specificity of mutation in Big Blue rats treated with the hepatocarcinogen N-hydroxy-2-acetylaminofluorene. *Environ. Mol. Mutagen.* 37: 203-214.

da Costa GG, Manjanatha MG, Marques MM, Beland FA. 2002. Induction of lacI mutations in Big Blue rats treated with tamoxifen and alpha-hydroxytamoxifen. *Cancer Lett.* 176: 37-45.

de Boer JG, Holcroft J, Cunningham ML, Glickman BW. 2000. Tris(2,3-dibromopropyl)phosphate causes a gradient of mutations in the cortex and outer and inner medullas of the kidney of lacI transgenic rats. *Environ. Mol. Mutagen.* 36: 1-4.

Dragsted LO, Daneshvar B, Vogel U, Autrup HN, Wallin H, Risom L, Møller P, Mølck AM, Hansen M, Poulsen HE, Loft S. 2002. A sucrose-rich diet induces mutations in the rat colon. *Cancer Res.* 62: 4339-4345.

Dycaico, M. J., G. S. Provost, P. L. Kretz, S. L. Ransom, J. C. Moores, and J. M. Short. 1994. The use of shuttle vectors for mutation analysis in transgenic mice and rats. *Mutat. Res.* 307: 461-478.

Dycaico, M. J., G. R. Stuart, G. M. Tobal, J. G. de Boer, B. W. Glickman, and G. S. Provost. 1996. Species-specific differences in hepatic mutant frequency and mutational spectrum among lambda/lacI transgenic rats and mice following exposure to aflatoxin B1. *Carcinogenesis* 17: 2347-2356.

Fletcher K, Soames AR, Tinwell H, Lefevre PA, Ashby J. 1999. Hepatic gene mutations induced in Big Blue rats by both the potent rat liver azo-carcinogen 6BT and its reported noncarcinogenic analogue 5BT. *Environ. Mol. Mutagen.* 34: 148-153.

Hansen M, Baunsgaard D, Autrup H, Vogel UB, Møller P, Lindcrona R, Wallin H, Poulsen HE, Loft S, Dragsted LO. 2008. Sucrose, glucose and fructose have similar genotoxicity in the rat colon and affect the metabolome. *Food Chem. Toxicol.* 46: 752-760.

Hoshi M, Morimura K, Wanibuchi H, Wei M, Okochi E, Ushijima T, Takaoka K, Fukushima S. 2004. No-observed effect levels for carcinogenicity and for in vivo mutagenicity of a genotoxic carcinogen. *Toxicol. Sci.* 81: 273-279.

Krebs O, Schäfer B, Wolff T, Oesterle D, Deml E, Sund M, Favor J. 1998. The DNA damaging drug cyproterone acetate causes gene mutations and induces glutathione-S-transferase P in the liver of female Big Blue transgenic F344 rats. *Carcinogenesis* 19: 241-245.



- Manjanatha MG, Shelton SD, Aidoo A, Lyn-Cook LE, Casciano DA. 1998. Comparison of in vivo mutagenesis in the endogenous Hprt gene and the lacI transgene of Big Blue(R) rats treated with 7, 12-dimethylbenz[a]anthracene. *Mutat. Res.* 401: 165-178.
- Manjanatha MG, Shelton SD, Bishop M, Shaddock JG, Dobrovolsky VN, Heflich RH, Webb PJ, Blankenship LR, Beland FA, Greenlees KJ, Culp SJ. 2004. Analysis of mutations and bone marrow micronuclei in Big Blue rats fed leucomalachite green. *Mutat. Res.* 547: 5-18.
- Mei N, Arlt VM, Phillips DH, Heflich RH, Chen T. 2006. DNA adduct formation and mutation induction by aristolochic acid in rat kidney and liver. *Mutat. Res.* 602: 83-91.
- Mei N, Chou MW, Fu PP, Heflich RH, Chen T. 2004. Differential mutagenicity of riddelliine in liver endothelial and parenchymal cells of transgenic big blue rats. *Cancer Lett.* 215: 151-158.
- Mei N, Heflich RH, Chou MW, Chen T. 2004. Mutations induced by the carcinogenic pyrrolizidine alkaloid riddelliine in the liver cII gene of transgenic big blue rats. *Chem. Res. Toxicol.* 17: 814-818.
- Mittelstaedt RA, Mei N, Webb PJ, Shaddock JG, Dobrovolsky VN, McGarrity LJ, Morris SM, Chen T, Beland FA, Greenlees KJ, Heflich RH. 2004. Genotoxicity of malachite green and leucomalachite green in female Big Blue B6C3F1 mice. *Mutat. Res.* 561: 127-138.
- Miura D, Dobrovolsky VN, Kasahara Y, Katsuura Y, Heflich RH. 2008. Development of an in vivo gene mutation assay using the endogenous Pig-A gene: I. Flow cytometric detection of CD59-negative peripheral red blood cells and CD48-negative spleen T-cells from the rat. *Environ. Mol. Mutagen.* 49: 614-621.
- Møller P, Hansen M, Autrup H, Bornholt J, Vogel U, Mølck AM, Wallin H, Dragsted LO, Risom L, Poulsen HE, Loft S. 2003. Dietary low-dose sucrose modulation of IQ-induced genotoxicity in the colon and liver of Big Blue rats. *Mutat. Res.* 527: 91-97.
- Møller P, Wallin H, Vogel U, Autrup H, Risom L, Hald MT, Daneshvar B, Dragsted LO, Poulsen HE, Loft S. 2002. Mutagenicity of 2-amino-3-methylimidazo[4,5-f]quinoline in colon and liver of Big Blue rats: role of DNA adducts, strand breaks, DNA repair and oxidative stress. *Carcinogenesis* 23: 1379-1385.
- Müller AK, Farombi EO, Møller P, Autrup HN, Vogel U, Wallin H, Dragsted LO, Loft S, Binderup ML. 2004. DNA damage in lung after oral exposure to diesel exhaust particles in Big Blue rats. *Mutat. Res.* 550: 123-132.
- Nagao M, Ochiai M, Okochi E, Ushijima T, Sugimura T. 2001. LacI transgenic animal study: relationships among DNA-adduct levels, mutant frequencies and cancer incidences. *Mutat. Res.* 477: 119-124.
- Nakai Y, Nelson WG, De Marzo AM. 2007. The dietary charred meat carcinogen 2-amino-1-methyl-6-phenylimidazo[4,5-b]pyridine acts as both a tumor initiator and promoter in the rat ventral prostate. *Cancer Res.* 67: 1378-1384.
- Okochi E, Watanabe N, Shimada Y, Takahashi S, Wakazono K, Shirai T, Sugimura T, Nagao M, Ushijima T. 1999. Preferential induction of guanine deletion at 5'-GGGA-3' in rat mammary glands by 2-amino-1-methyl-6-phenylimidazo[4,5-b]pyridine. *Carcinogenesis* 20: 1933-1938.

Okonogi H, Stuart GR, Okochi E, Ushijima T, Sugimura T, Glickman BW, Nagao M. 1997. Effects of gender and species on spectra of mutation induced by 2-amino-1-methyl-6-phenylimidazo[4,5-b]pyridine in the lacI transgene. *Mutat. Res.* 395: 93-99.

Risom L, Møller P, Hansen M, Autrup H, Bornholdt J, Vogel U, Wallin H, Poulsen HE, Dragsted LO, Loft S. 2003. Dietary elevated sucrose modulation of diesel-induced genotoxicity in the colon and liver of Big Blue rats. *Arch. Toxicol.* 77: 651-656.

Sato H, Sone H, Sagai M, Suzuki KT, Aoki Y. 2000. Increase in mutation frequency in lung of Big Blue rat by exposure to diesel exhaust. *Carcinogenesis* 21: 653-661.

Shan L, Yu M, Schut HA, Snyderwine EG. 2004. Susceptibility of rats to mammary gland carcinogenesis by the food-derived carcinogen 2-amino-1-methyl-6-phenylimidazo[4,5-b]pyridine (PhIP) varies with age and is associated with the induction of differential gene expression. *Am. J. Pathol.* 165: 191-202.

Stuart GR, Thorleifson E, Okochi E, de Boer JG, Ushijima T, Nagao M, Glickman BW. 2000. Interpretation of mutational spectra from different genes: analyses of PhIP-induced mutational specificity in the lacI and cII transgenes from colon of Big Blue rats. *Mutat. Res.* 452: 101-121.

Takahashi S, Ikeda Y, Kimoto N, Okochi E, Cui L, Nagao M, Ushijima T, Shirai T. 2000. Mutation induction by mechanical irritation caused by uracil-induced urolithiasis in Big Blue rats. *Mutat. Res.* 447: 275-280.

Thornton AS, Oda Y, Stuart GR, Glickman BW, de Boer JG. 2001. Mutagenicity of TCDD in Big Blue transgenic rats. *Mutat. Res.* 478: 45-50.

Topinka J, Oesterle D, Reimann R, Wolff T. 2004. No-effect level in the mutagenic activity of the drug cyproterone acetate in rat liver. Part I. Single dose treatment. *Mutat. Res.* 550: 89-99.

Vogel U, Danesvar B, Autrup H, Risom L, Weimann A, Poulsen HE, Møller P, Loft S, Wallin H, Dragsted LO. 2003. Effect of increased intake of dietary animal fat and fat energy on oxidative damage, mutation frequency, DNA adduct level and DNA repair in rat colon and liver. *Free Radic Res.* 37: 947-956.

Watson DE, Cunningham ML, Tindall KR. 1998. Spontaneous and ENU-induced mutation spectra at the cII locus in Big Blue Rat2 embryonic fibroblasts. *Mutagenesis* 13: 487-497.

Yamaguchi T, Wei M, Hagihara N, Omori M, Wanibuchi H, Fukushima S. 2008. Lack of mutagenic and toxic effects of low dose potassium bromate on kidneys in the Big Blue rat. *Mutat. Res.* 652: 1-11.

Yang H, Glickman BW, de Boer JG. 2002. Effect of conjugated linoleic acid on the formation of spontaneous and PhIP-induced mutation in the colon and cecum of rats. *Mutat. Res.* 500: 157-168.

Yang H, Holcroft J, Glickman BW, de Boer JG. 2003. Conjugated linoleic acid inhibits mutagenesis by 2-amino-1-methyl-6-phenylimidazo[4,5-b]pyridine in the prostate of Big Blue rats. *Mutagenesis* 18: 195-200.

Yang H, Stuart GR, Glickman BW, de Boer JG. 2001. Modulation of 2-amino-1-methyl-6-phenylimidazo[4,5-b]pyridine-induced mutation in the cecum and colon of big blue rats by conjugated linoleic acid and 1,2-dithiole-3-thione. *Nutr. Cancer* 39: 259-266.

Yu M, Jones ML, Gong M, Sinha R, Schut HA, Snyderwine EG. 2002. Mutagenicity of 2-amino-1-methyl-6-phenylimidazo[4,5-b]pyridine (PhIP) in the mammary gland of Big Blue rats on high-and low-fat diets. *Carcinogenesis* 23: 877-884.
